# Supplementary material for: Association Between Psychosocial Disorders and Gastroesophageal Reflux Disease: A Systematic Review and Meta-analysis
Source: PubMed Central journal article supplement — J Neurogastroenterol Motil. 2022 Apr 30;28(2):212–21. doi: 10.5056/jnm21044 (PMC8978133; doi:10.5056/jnm21044), 2022-04-30
Supplement: jnm-28-2-212-supple.pdf [file jnm-28-2-212-supple.pdf]

**Supplementary Table 1.** Quality Assessments of the Case-control Studies Included in the Meta-analysis According to the Newcastle-Ottawa Scale

| Study                                         | Selection                        |                                 |                       | Comparability          | Exposure                                                                   |                           |                                                     |                   |
|-----------------------------------------------|----------------------------------|---------------------------------|-----------------------|------------------------|----------------------------------------------------------------------------|---------------------------|-----------------------------------------------------|-------------------|
|                                               | Is the case definition adequate? | Representativeness of the cases | Selection of controls | Definition of controls | Comparability of cases and controls on the basis of the design or analysis | Ascertainment of exposure | Same method of ascertainment for cases and controls | Non-response rate |
| Yang et al <sup>36</sup><br>(2015)            | *                                | *                               |                       | *                      | **                                                                         | *                         | *                                                   | *                 |
| Javadi and Shafikhani <sup>37</sup><br>(2017) | *                                | *                               |                       | *                      | *                                                                          | *                         | *                                                   | *                 |
| Denver et al <sup>38</sup><br>(2013)          | *                                | *                               |                       | *                      | **                                                                         | *                         | *                                                   |                   |
| Kim et al <sup>39</sup><br>(2018)             | *                                | *                               | *                     | *                      | **                                                                         | *                         | *                                                   | *                 |

In the Newcastle-Ottawa Scale, if the study meets the option with star, it is denoted as a star. A study can be awarded a maximum of 1 star for each numbered item within the selection and exposure categories. A maximum of 2 stars can be given for comparability.

**Supplementary Table 2.** Quality Assessments of the Cohort Studies Included in the Meta-analysis According to the Newcastle-Ottawa Scale

| Study                             | Selection                                |                                      |                           |                                                                          | Comparability                                                   | Outcome               |                                                 |                                  |
|-----------------------------------|------------------------------------------|--------------------------------------|---------------------------|--------------------------------------------------------------------------|-----------------------------------------------------------------|-----------------------|-------------------------------------------------|----------------------------------|
|                                   | Representativeness of the exposed cohort | Selection of the non- exposed cohort | Ascertainment of exposure | Demonstration that outcome of interest was not present at start of study | Comparability of cohorts on the basis of the design or analysis | Assessment of outcome | Was follow-up long enough for outcomes to occur | Adequacy of follow-up of cohorts |
| Lee et al <sup>40</sup><br>(2018) | *                                        | *                                    | *                         |                                                                          | *                                                               | *                     |                                                 | *                                |
| On et al <sup>41</sup><br>(2017)  | *                                        | *                                    | *                         |                                                                          | **                                                              | *                     |                                                 | *                                |
| You et al <sup>42</sup><br>(2015) | *                                        | *                                    | *                         | *                                                                        | **                                                              | *                     | *                                               | *                                |

In the Newcastle-Ottawa Scale, if the study meets the option with star, it is denoted as a star. A study can be awarded a maximum of 1 star for each numbered item within the selection and outcome categories. A maximum of 2 stars can be given for comparability.

**Supplementary Table 3.** Quality Assessments of the Cross-sectional Studies Included in the Meta-analysis Based on the Agency for Healthcare Research and Quality Criteria

| Study                           | Define the source of information (survey, record review) | List inclusion and exclusion criteria for exposed and unexposed subjects (cases and controls) or refer to previous publications | Indicate time period used for identifying patients | Indicate whether the subjects were consecutive if not population-based | Indicate if evaluators of subjective components of study were masked to other aspects of the status of the participants | Describe any assessments undertaken for quality assurance purposes (eg, test/retest of primary outcome measurements) | Explain any patient exclusions from analysis | Describe how confounding was assessed and/or controlled | If applicable, explain how missing data were handled in the analysis | Summarize patient response rates and completeness of data collection | Clarify what follow-up, if any, was expected and the percentage of patients for which incomplete data or follow-up was obtained |
|---------------------------------|----------------------------------------------------------|---------------------------------------------------------------------------------------------------------------------------------|----------------------------------------------------|------------------------------------------------------------------------|-------------------------------------------------------------------------------------------------------------------------|----------------------------------------------------------------------------------------------------------------------|----------------------------------------------|---------------------------------------------------------|----------------------------------------------------------------------|----------------------------------------------------------------------|---------------------------------------------------------------------------------------------------------------------------------|
| Song et al <sup>†3</sup> (2013) | *                                                        | *                                                                                                                               |                                                    | *                                                                      |                                                                                                                         | *                                                                                                                    |                                              |                                                         |                                                                      | *                                                                    | *                                                                                                                               |
| Chou et al <sup>†4</sup> (2014) | *                                                        | *                                                                                                                               |                                                    | *                                                                      |                                                                                                                         | *                                                                                                                    |                                              |                                                         |                                                                      | *                                                                    | *                                                                                                                               |

In this table of Agency for Healthcare Research and Quality, if the study meets the option, it is denoted as a star. If a study does not match this option, no star is given.

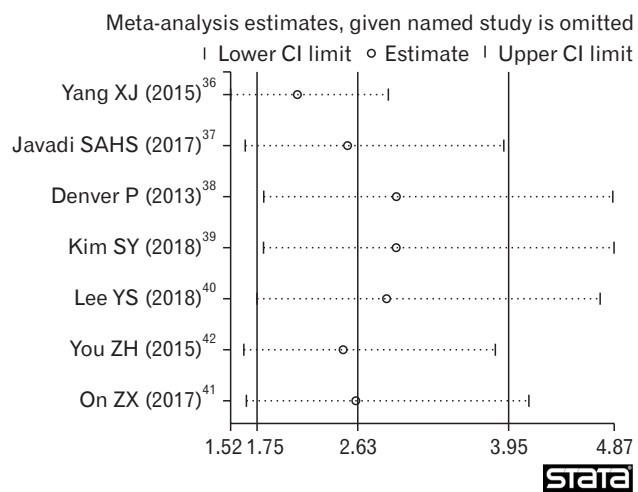

**Supplementary Figure 1.** Sensitivity analysis of the associations between gastroesophageal reflux disease and depression.

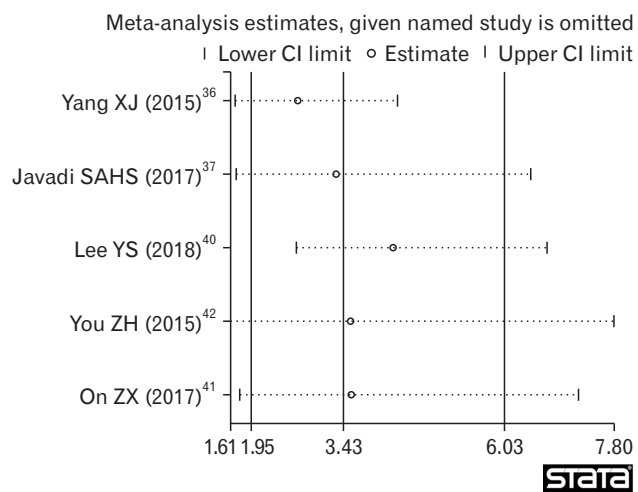

**Supplementary Figure 2.** Sensitivity analysis of the associations between gastroesophageal reflux disease and anxiety.
